# Supplementary material for: Photo-activated ionic gelation of alginate hydrogel: real-time rheological monitoring of the two-step crosslinking mechanism
Source: Royal Society of Chemistry journal article supplement (doi:10.1039/c4sm00411f), 2014-01-01
Supplement: c4sm00411f1.pdf [file c4sm00411f1.pdf]

## Supplemental Information

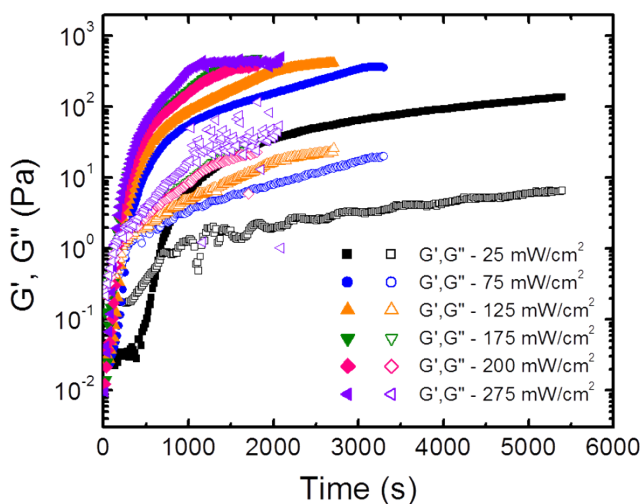

**Supplemental Figure 1.** Time sweeps of 4 wt./vol.% alginate, 60 mM PAG, and 30 mM  $\text{CaCO}_3$  exposed to UV irradiation at varying intensities. The  $G'$ - $G''$  crossover is delayed as the irradiation intensity decreases.

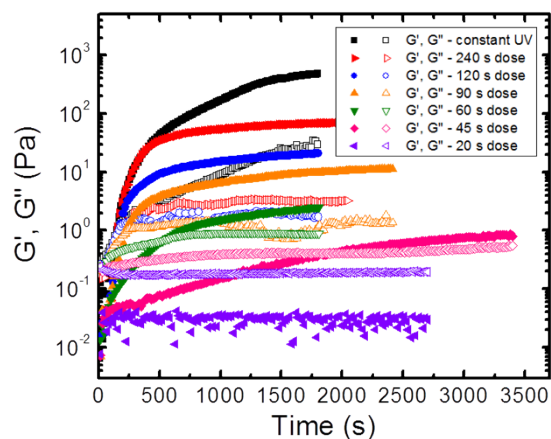

**Supplemental Figure 2.** Time sweeps of 4 wt./vol.% alginate, 60 mM PAG, and 30 mM  $\text{CaCO}_3$  subjected to UV irradiation for varying durations of exposure.

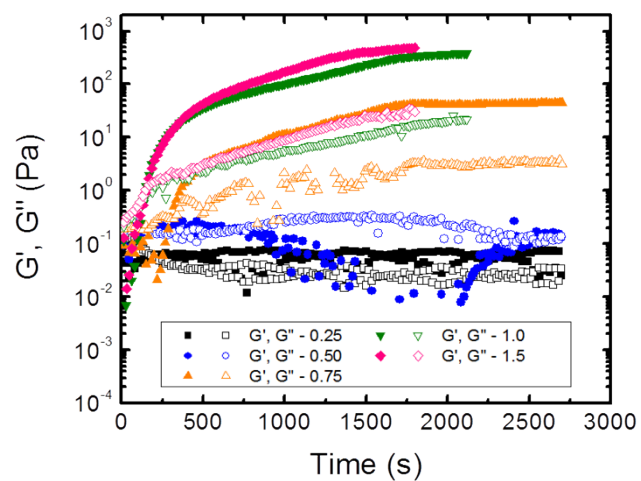

**Supplemental Figure 3.** Time sweeps monitoring  $G'$  and  $G''$  over time for 4 wt./vol.% alginate containing varying concentrations of  $\text{CaCO}_3$  when exposed to UV irradiation.
